# Supplementary material for: MOFs synthesized by the ionothermal method addressing the leaching problem of IL–polymer composite membranes
Source: Royal Society of Chemistry journal article supplement (doi:10.1039/c4cc05526h), 2014-01-01
Supplement: c4cc05526h1.pdf [file c4cc05526h1.pdf]

## Supporting Information

MOFs synthesized in ionothermal method coping with leaching problem of IL-polymer composite membrane

### Experimental Section

#### Materials

Zn (NO<sub>3</sub>)<sub>2</sub>·6H<sub>2</sub>O (>98%, Sigma-Aldrich), 2-Methylimidazole (>99%, Acros Organics), Choline hydroxide (45% wt. % in water, TCI), Ethanol (Fischer Scientific), PVA (99% hydrolyzed, average Mw = 86,000–89,000, Sigma-Aldrich).

#### Synthesis of ZIF-8 nanocrystals in ionothermal method

Zinc nitrate (0.76g) and 2-methylimidazole (0.4g) were slowly added into choline hydroxide (10 ml) and stirred for about 2 hours at room temperature. After centrifuging and overnight drying, ZIF-8 nanocrystals were obtained.

#### Preparation of ZIF-8 and PVA composite membranes in situ crystallization method

PVA was fully dissolved in water to make a 10% solution at 90°C (10 ml). Zinc nitrate (0.76g) and Hmim (0.4g) were slowly added into choline hydroxide (10 ml) to make ZIF-8 precursor. Different amount of precursor solution was slowly added into PVA solution. During stirring, the color of the solution changed from clear to white. This mixture was stirred for about 4 hours at room temperature. After removing the air under vacuum, the solution was poured into glass panes, water was evaporated at 60°C. When visually dry, the membrane was peeled off from the glass substrate

and washed repeatedly with distilled water to remove unreacted reactants. A series of composite membranes were obtained named PVA-ZIF8-x (6, 13, 28, 48), x was the weight percentage ratio of the ZIF-8 nanoparticles to the composite membrane. We didn't mention composite membrane with more contents of ZIF-8, because the membrane is easy to be broken when ZIF-8 precursor was added more.

### **Structure characterization**

The crystalline structures of ZIF-8 nanocrystals were determined by the X-ray diffraction (XRD) measurements using a Siemens D5005 diffractometer with Cu-K $\alpha$  radiation ( $\lambda=1.5418$  Å). The size and morphology of ZIF-8 nanocrystals were monitored by transmission electron microscope (TEM, JEOL 2000FX), operated at the accelerating voltage of 300 kV, morphology of composite membranes was tested by field-emission scanning electron microscope (FE-SEM: JEOS JSM 6700F). Fourier transform infrared (FT-IR) spectroscopy was performed using a Nicolet Impact 410 spectrometer. The samples were dispersed in dry KBr disks and measured over the range of 4000 to 500 cm<sup>-1</sup>. The X-ray photoelectron spectroscopy (XPS) spectra were acquired using a Scienta ESCA200 spectrometer. N<sub>2</sub> adsorption measurements were conducted on an ASAP 2010M porosimeter at 77K.

### **Hydroxide conductivity**

Two-probe a.c. impedance spectroscopy was performed to explore the properties of the materials in anion conducting from 0.1 Hz to 100 kHz, 10 mV AC perturbation and 0.0 V DC rest voltage using a Princeton Applied Research Model 273A Potentiostat (Model 5210 frequency response detector, EG&G PARC, Princeton, NJ). Composite membranes were cut into square with a side length of 1cm. The hydroxide conductivity was calculated by the following formula:

$$\sigma = \frac{L}{RA} \quad (1)$$

where  $\sigma$  is the conductivity,  $L$  is the distance between the electrodes used to measure the potential,  $R$  is membrane resistance and  $A$  is cross-sectional area of membrane.

### Mechanical properties

The mechanical properties of the thin dry membranes were evaluated at room temperature on SHIMADZU AG-I 1KN at a speed of 2 mm min<sup>-1</sup>. The size of the samples was 15 mm × 4 mm. Each sample was tested at least four times to reach an average value.

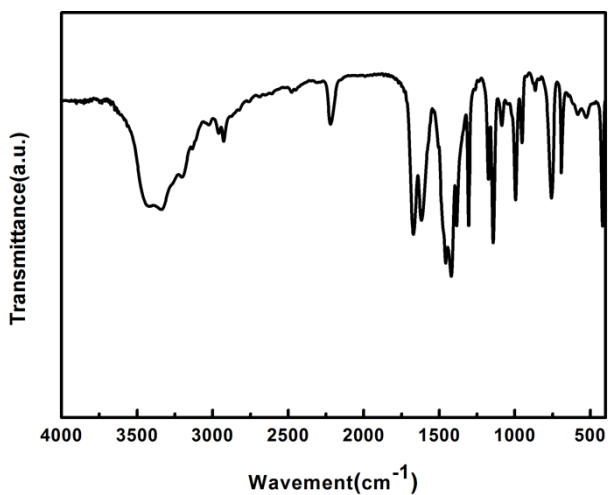

**Fig. S1** FT-IR spectrum of the as-synthesized ZIF-8 samples

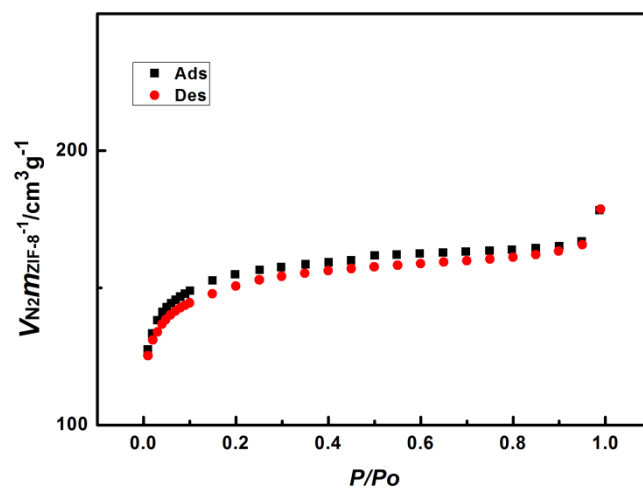

**Fig. S2.**  $N_2$  adsorption (black symbols) and desorption (red symbols) isotherms of as-synthesized ZIF-8 at 77K.

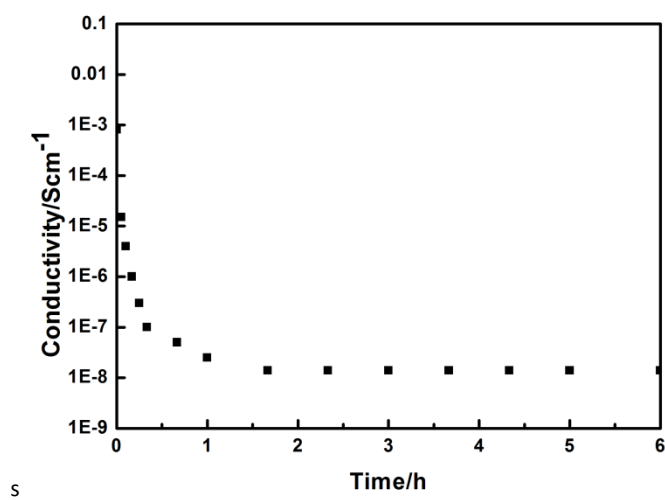

**Fig. S3** Conductivities of the composite membrane with ZIF-8 fillers synthesized in methanol immersed in water for different time

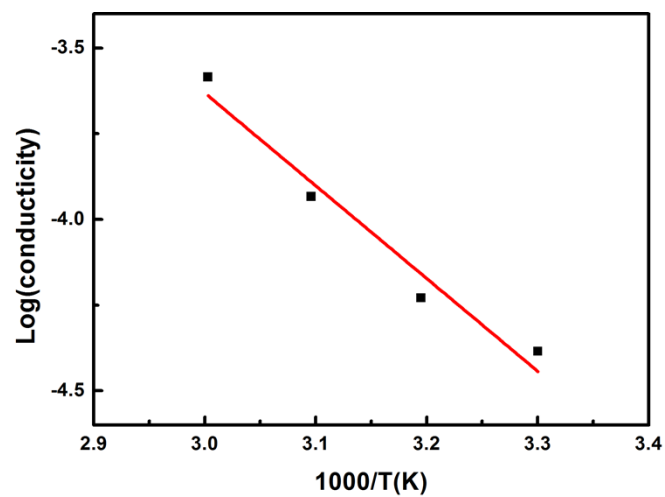

**Fig. S4** Arrhenius-type plot of the conductivity of the PVA-ZIF8i-48 composite membrane at various temperatures
